# Supplementary material
Source: Springer Nature journal article supplement (https://www.springermedizin.de/resource/supplementary/12882_2013_730_MOESM2_ESM.pdf/9454580)
Supplement: MOESM2 [file 9454580]

## Enrollment

Assessed for eligibility (n=250)

Excluded (n=20)

- ◆ Not meeting inclusion criteria
- ◆ Declined to participate
- ◆ Other reasons

Interventional Cohort (n=230)

## Allocation

Allocated to intervention (n= 230)

- ◆ Received allocated intervention (n= 210 )
- ◆ Did not receive allocated intervention (n= 20)

Historical Controls (n= 200)

- ◆ Did not receive allocated intervention

## Follow-Up/Evaluation (at 2, 4 and 12 weeks)

Lost to follow-up (n=5)

Discontinued intervention (n= 5)

Lost to follow-up (n=0)

## Analysis

Analysed (n=200)

Analysed (n=200)
